# Supplementary material for: New Insights into the Structural Requirements of Isatin-Derived Pro-Apoptotic Agents against Acute Myeloid Leukemia
Source: Pharmaceuticals (Basel). 2022 Dec 17;15(12):1579. doi: 10.3390/ph15121579 (PMC9784816; doi:10.3390/ph15121579)
Supplement: Supplementary file 1 [file pharmaceuticals-15-01579-s001.zip › pharmaceuticals-2093347-supplementary.pdf]

## Supplementary Data:

# New Insights into the Structural Requirements of Isatin-derived Pro-apoptotic Agents against Acute Myeloid Leukemia

Ahmed K. Hamdy <sup>1,2</sup>, Takashi Sakamoto <sup>1</sup>, Tsugumasa Toma <sup>1</sup>, Masaharu Sakamoto <sup>1</sup>, Mohammed A. S. Abourehab<sup>3</sup>, Masami Otsuka <sup>1,4</sup>, Mikako Fujita <sup>1\*</sup>, Hiroshi Tateishi <sup>1\*</sup> and Mohamed O. Radwan <sup>1,5\*</sup>

<sup>1</sup> Medicinal and Biological Chemistry Science Farm Joint Research Laboratory, Faculty of Life Sciences, Kumamoto University, Kumamoto 862-0973, Japan

<sup>2</sup> Department of Medicinal Chemistry, Faculty of Pharmacy, Assiut University, Assiut 71526, Egypt

<sup>3</sup> Department of Pharmaceutics, College of Pharmacy, Umm Al-Qura University, Makkah 21955, Saudi Arabia

<sup>4</sup> Department of Drug Discovery, Science Farm, Ltd., Kumamoto 862-0976, Japan

<sup>5</sup> National Research Centre, Chemistry of Natural Compounds Department, Pharmaceutical and Drug Industries Research Division, Dokki, Cairo 12622, Egypt

\* Correspondence: mohamedradwan@kumamoto-u.ac.jp (M.O.R.); htateishi@kumamoto-u.ac.jp (H.T.); mfujita@kumamoto-u.ac.jp (M.F.)

### Table of contents

| Figure | Title                                                                                     | Page |
|--------|-------------------------------------------------------------------------------------------|------|
| S1     | <sup>1</sup> H-NMR spectrum of compound <b>3</b> (600MHz, DMSO/ <i>d</i> <sub>6</sub> )   | 2    |
| S2     | <sup>13</sup> C-NMR spectrum of compound <b>3</b> (150MHz, DMSO/ <i>d</i> <sub>6</sub> )  | 2    |
| S3     | <sup>1</sup> H-NMR spectrum of compound <b>4</b> (600MHz, DMSO/ <i>d</i> <sub>6</sub> )   | 3    |
| S4     | <sup>13</sup> C-NMR spectrum of compound <b>4</b> (150MHz, DMSO/ <i>d</i> <sub>6</sub> )  | 3    |
| S5     | <sup>1</sup> H-NMR spectrum of compound <b>5a</b> (600MHz, DMSO/ <i>d</i> <sub>6</sub> )  | 4    |
| S6     | <sup>13</sup> C-NMR spectrum of compound <b>5a</b> (150MHz, DMSO/ <i>d</i> <sub>6</sub> ) | 4    |
| S7     | <sup>1</sup> H-NMR spectrum of compound <b>5b</b> (600MHz, DMSO/ <i>d</i> <sub>6</sub> )  | 5    |
| S8     | <sup>13</sup> C-NMR spectrum of compound <b>5b</b> (150MHz, DMSO/ <i>d</i> <sub>6</sub> ) | 5    |
| S9     | <sup>1</sup> H-NMR spectrum of compound <b>5c</b> (600MHz, DMSO/ <i>d</i> <sub>6</sub> )  | 6    |
| S10    | <sup>13</sup> C-NMR spectrum of compound <b>5c</b> (150MHz, DMSO/ <i>d</i> <sub>6</sub> ) | 6    |
| S11    | <sup>1</sup> H-NMR spectrum of compound <b>5d</b> (600MHz, DMSO/ <i>d</i> <sub>6</sub> )  | 7    |
| S12    | <sup>13</sup> C-NMR spectrum of compound <b>5d</b> (150MHz, DMSO/ <i>d</i> <sub>6</sub> ) | 7    |
| S13    | <sup>1</sup> H-NMR spectrum of compound <b>5e</b> (600MHz, DMSO/ <i>d</i> <sub>6</sub> )  | 8    |
| S14    | <sup>13</sup> C-NMR spectrum of compound <b>5e</b> (150MHz, DMSO/ <i>d</i> <sub>6</sub> ) | 8    |
| S15    | <sup>1</sup> H-NMR spectrum of compound <b>5f</b> (600MHz, DMSO/ <i>d</i> <sub>6</sub> )  | 9    |
| S16    | <sup>13</sup> C-NMR spectrum of compound <b>5f</b> (150MHz, DMSO/ <i>d</i> <sub>6</sub> ) | 9    |
| S17    | <sup>1</sup> H-NMR spectrum of compound <b>5g</b> (600MHz, CDCl <sub>3</sub> )            | 10   |
| S18    | <sup>13</sup> C-NMR spectrum of compound <b>5g</b> (150MHz, CDCl <sub>3</sub> )           | 10   |
| S19    | <sup>1</sup> H-NMR spectrum of compound <b>5h</b> (600MHz, DMSO/ <i>d</i> <sub>6</sub> )  | 11   |
| S20    | <sup>13</sup> C-NMR spectrum of compound <b>5h</b> (150MHz, DMSO/ <i>d</i> <sub>6</sub> ) | 11   |
| S21    | NCI SRB assay mean graph of compound <b>5a</b> at 10 μM concentration.                    | 12   |
| S21    | NCI SRB assay mean graph of compound <b>5b</b> at 10 μM concentration.                    | 13   |
| S23    | NCI SRB assay mean graph of compound <b>5c</b> at 10 μM concentration.                    | 14   |
| S24    | NCI SRB assay mean graph of compound <b>5d</b> at 10 μM concentration.                    | 15   |
| S25    | NCI SRB assay mean graph of compound <b>5e</b> at 10 μM concentration.                    | 16   |
| S26    | NCI SRB assay mean graph of compound <b>5f</b> at 10 μM concentration.                    | 17   |
| S27    | NCI SRB assay mean graph of compound <b>5g</b> at 10 μM concentration.                    | 18   |
| S28    | NCI SRB assay mean graph of compound <b>5h</b> at 10 μM concentration.                    | 19   |

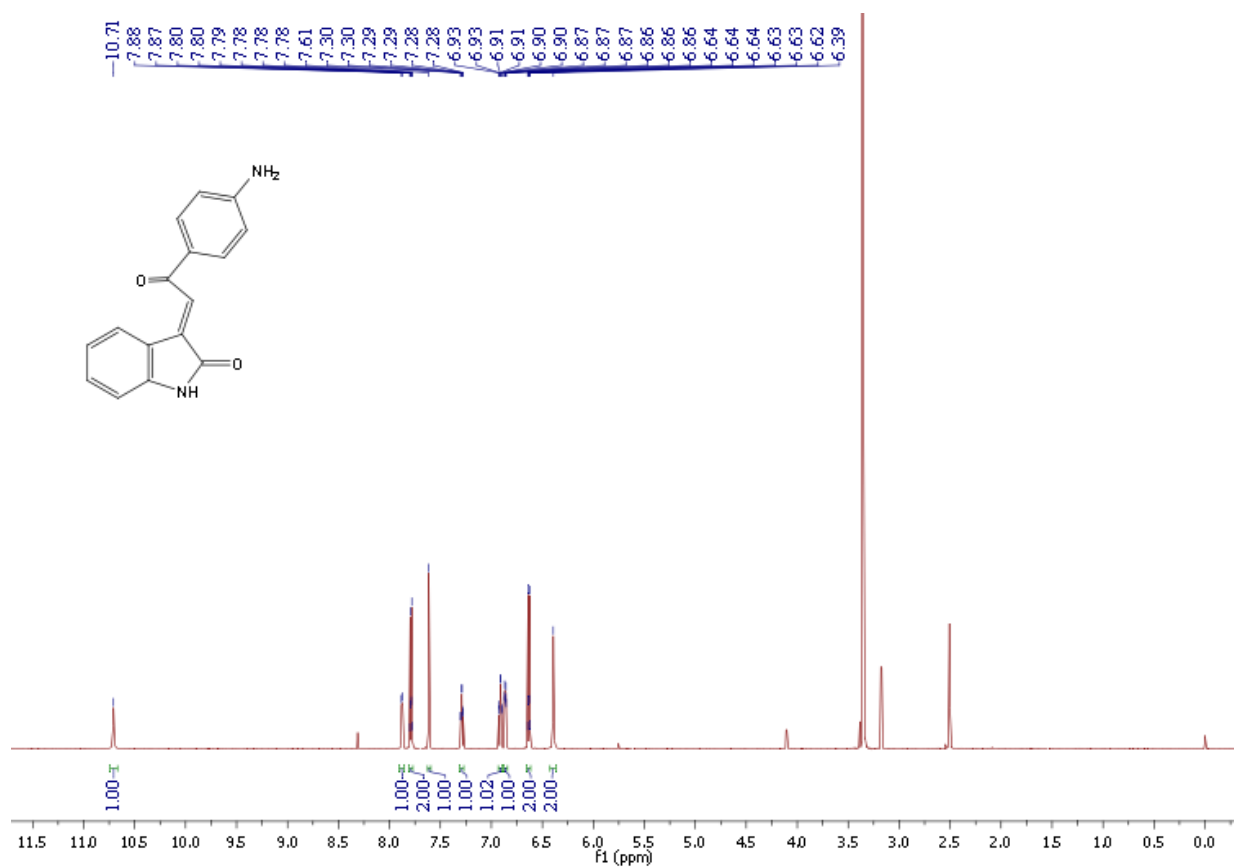

Figure S1: <sup>1</sup>H-NMR spectrum of compound 3 (600 MHz, DMSO/*d*<sub>6</sub>)

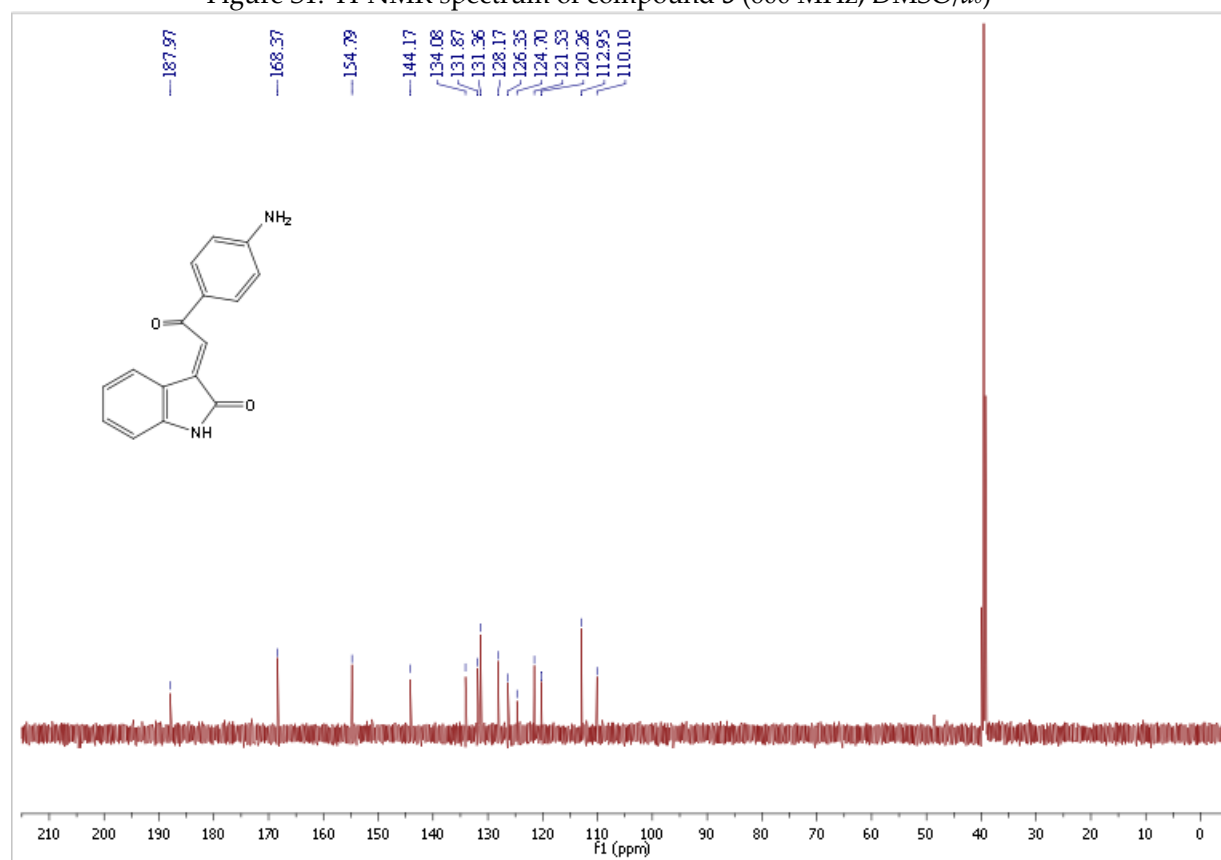

Figure S2: <sup>13</sup>C-NMR spectrum of compound 3 (150 MHz, DMSO/*d*<sub>6</sub>)

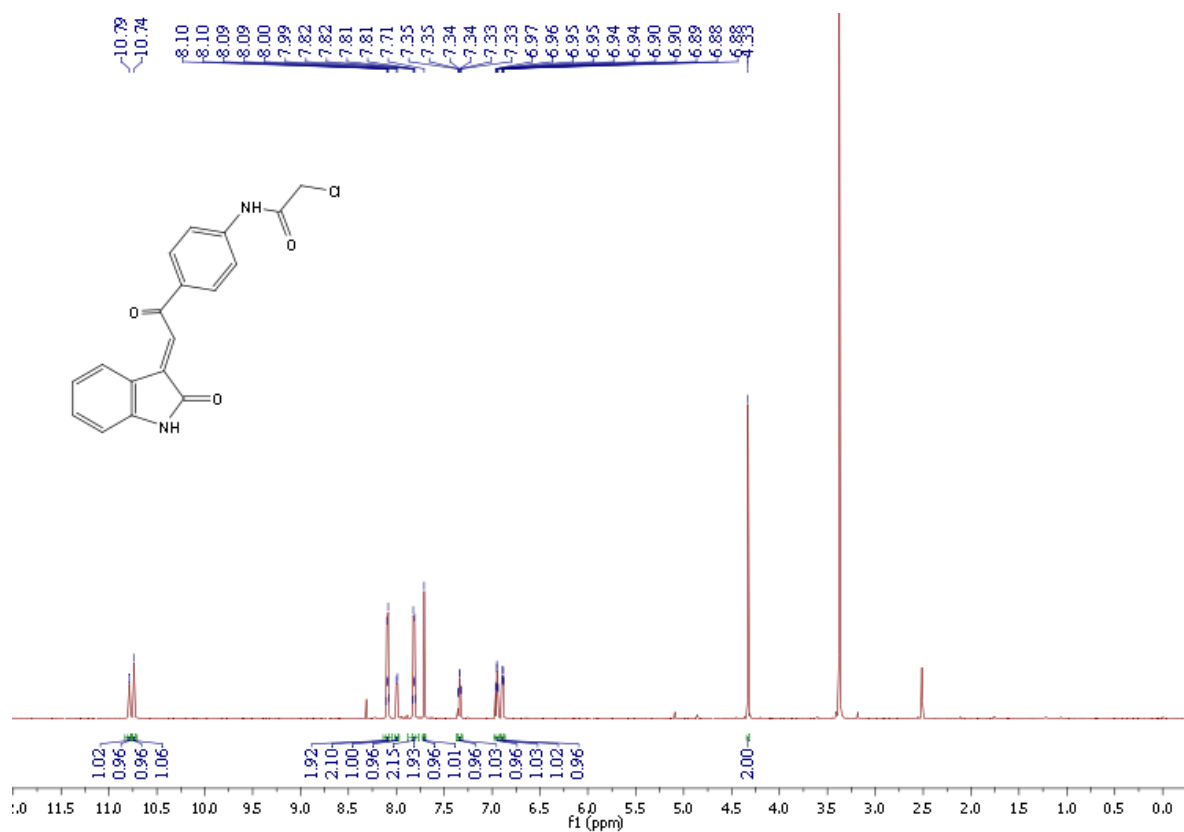

Figure S3: <sup>1</sup>H-NMR spectrum of compound **4** (600 MHz, DMSO/*d*<sub>6</sub>)

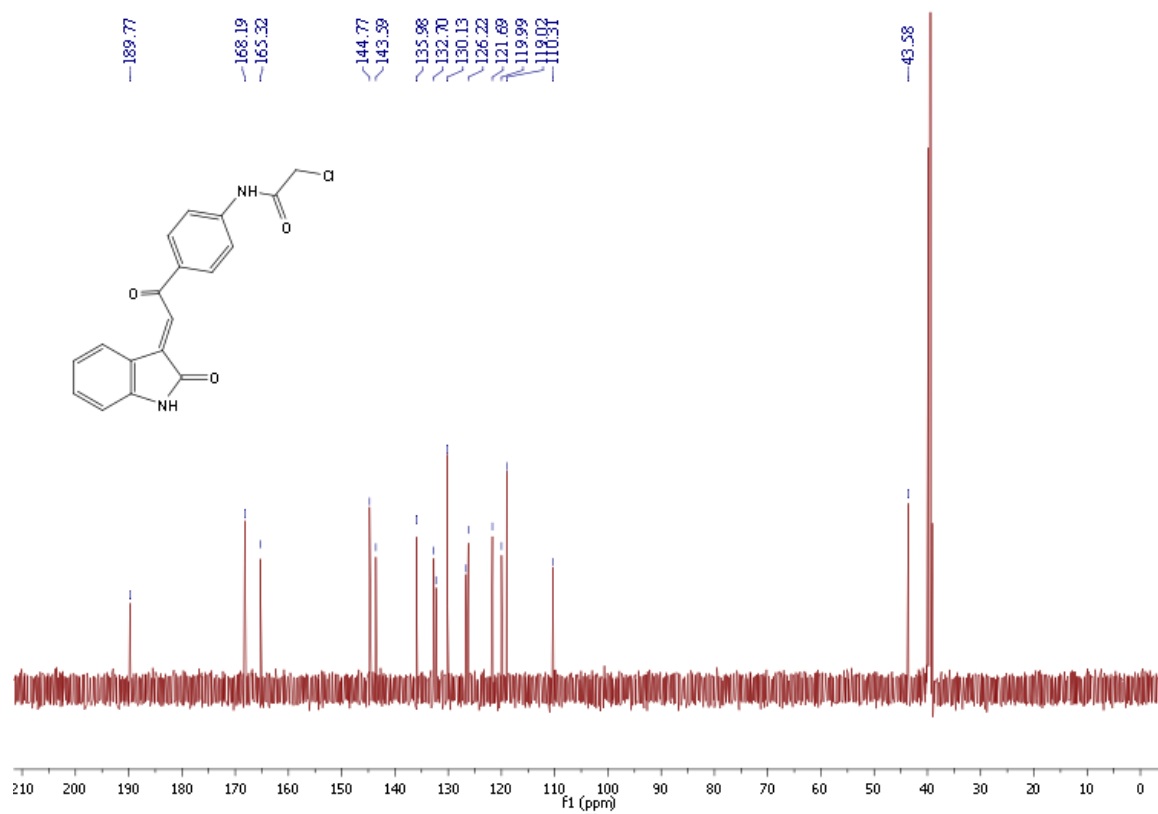

Figure S4: <sup>13</sup>C-NMR spectrum of compound **4** (150 MHz, DMSO/*d*<sub>6</sub>)

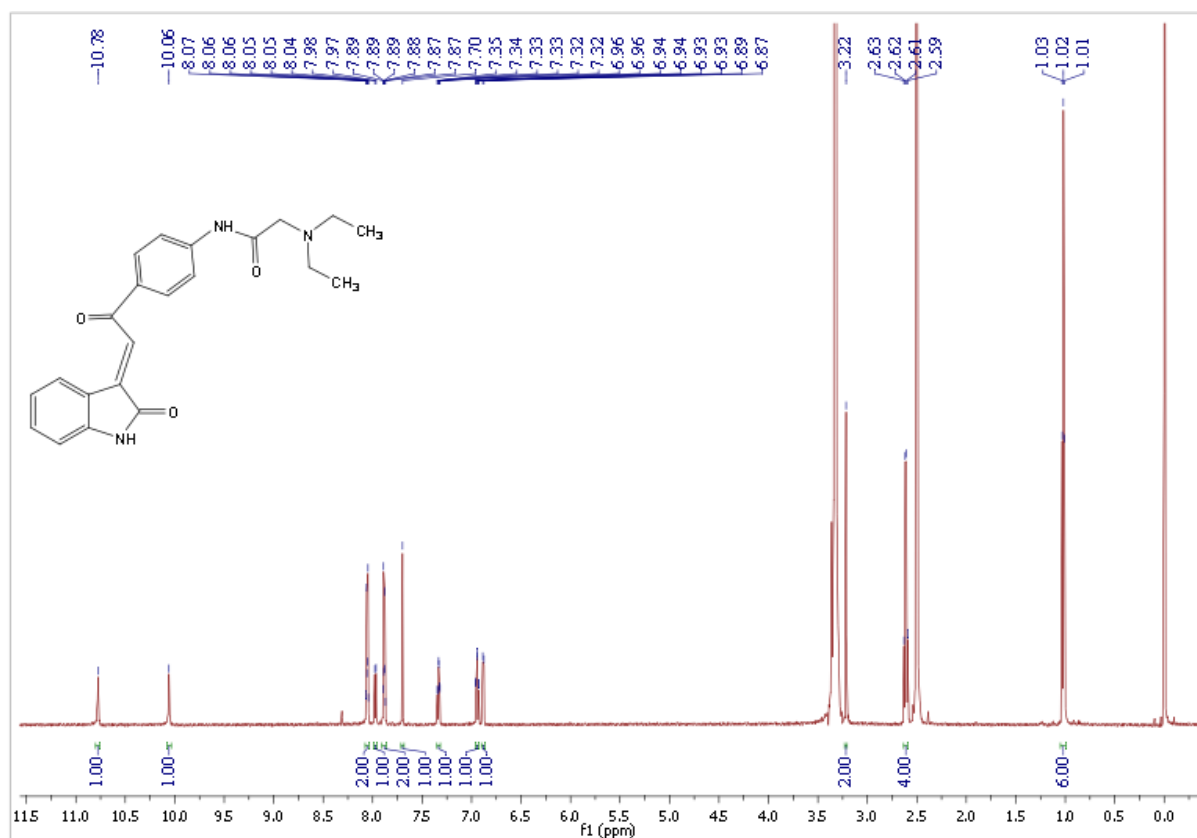

Figure S5: <sup>1</sup>H-NMR spectrum of compound 5a (600 MHz, DMSO/*d*<sub>6</sub>)

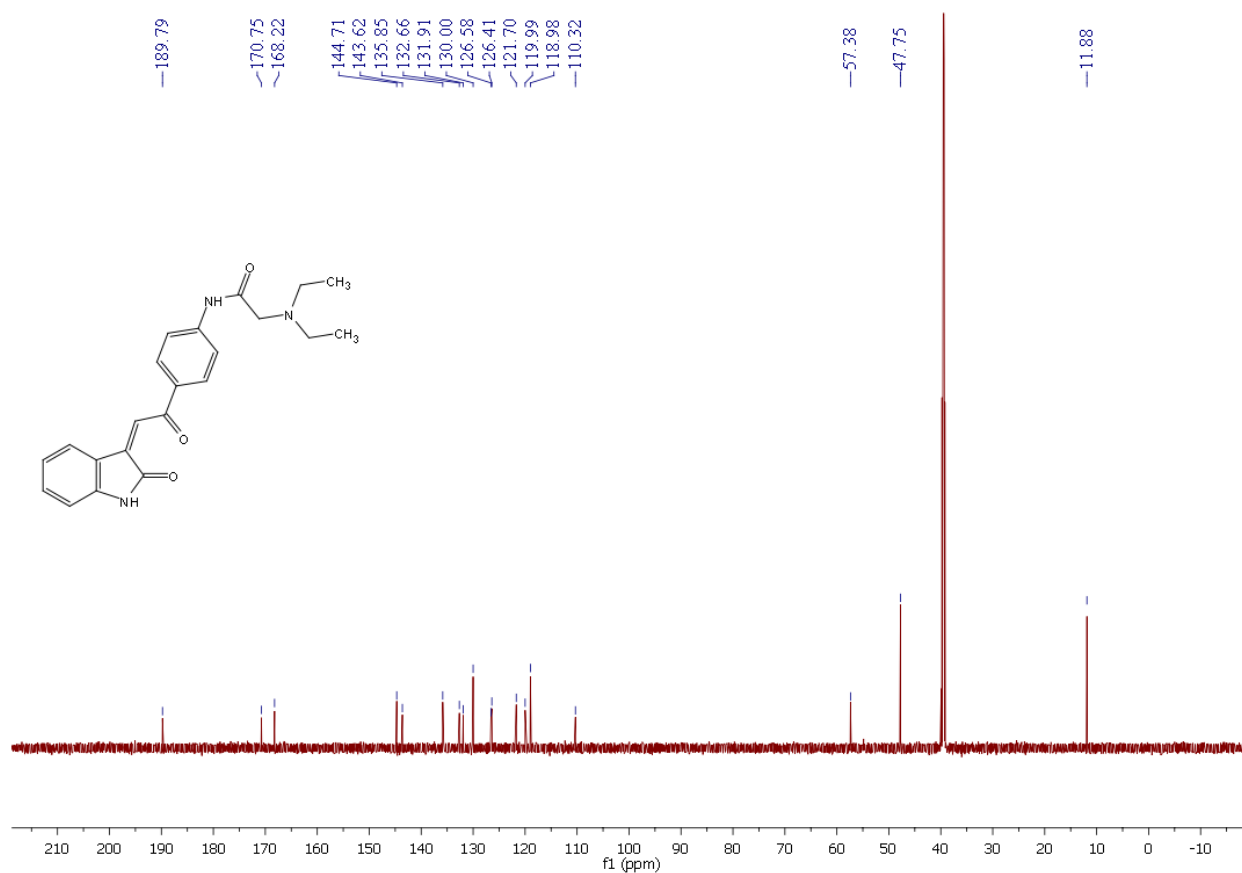

Figure S6: <sup>13</sup>C-NMR spectrum of compound 5a (150 MHz, DMSO/*d*<sub>6</sub>)

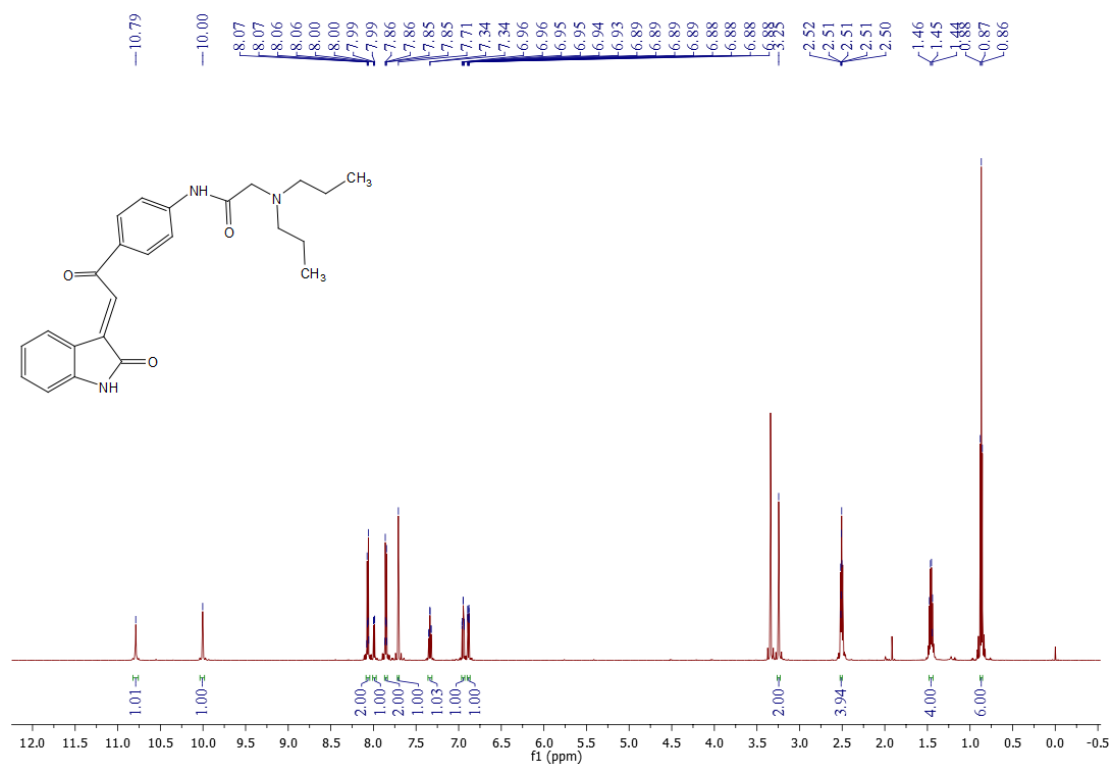

Figure S7: <sup>1</sup>H-NMR spectrum of compound **5b** (600 MHz, DMSO/*d*<sub>6</sub>)

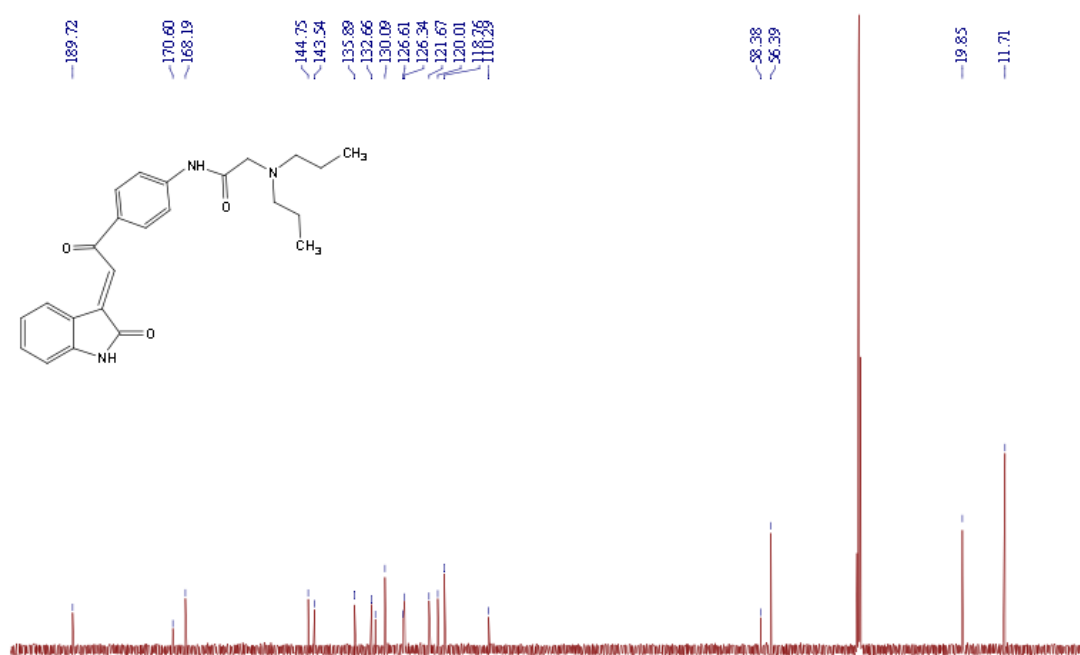

Figure S8: <sup>13</sup>C-NMR spectrum of compound **5b** (150 MHz, DMSO/*d*<sub>6</sub>)

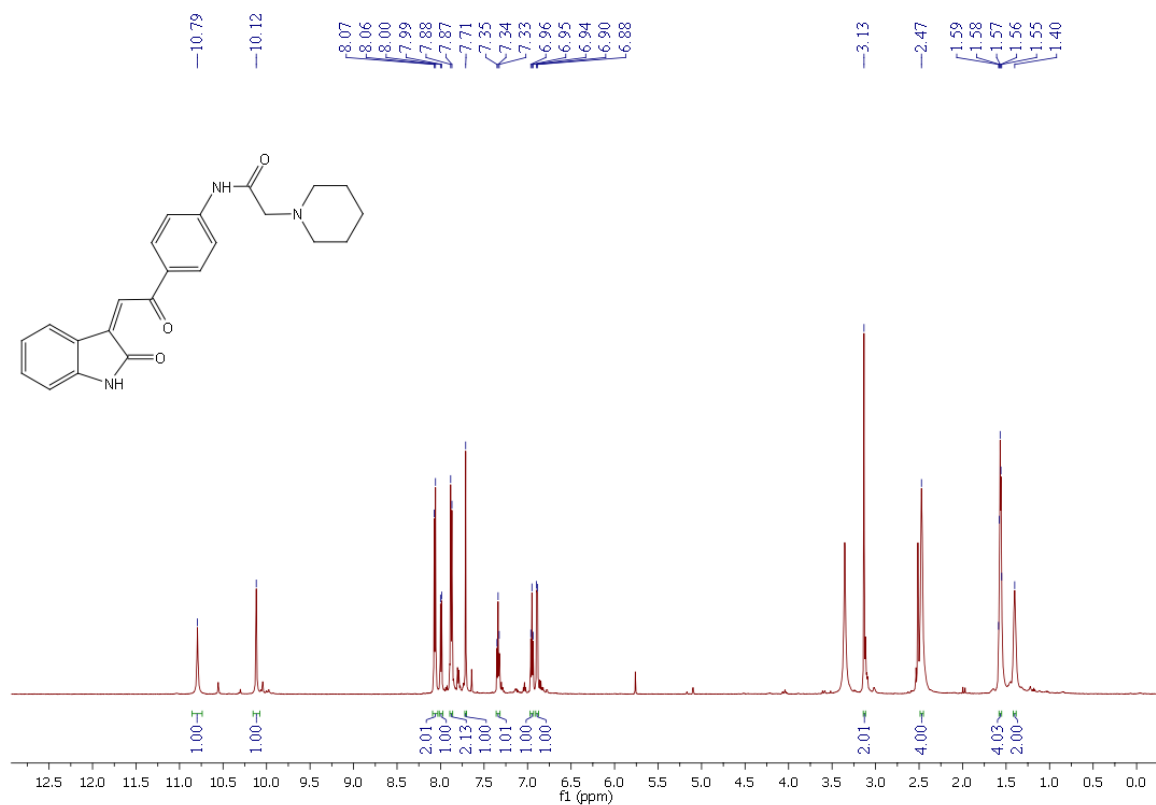

Figure S9: <sup>1</sup>H-NMR spectrum of compound 5c (600 MHz, DMSO/*d*<sub>6</sub>)

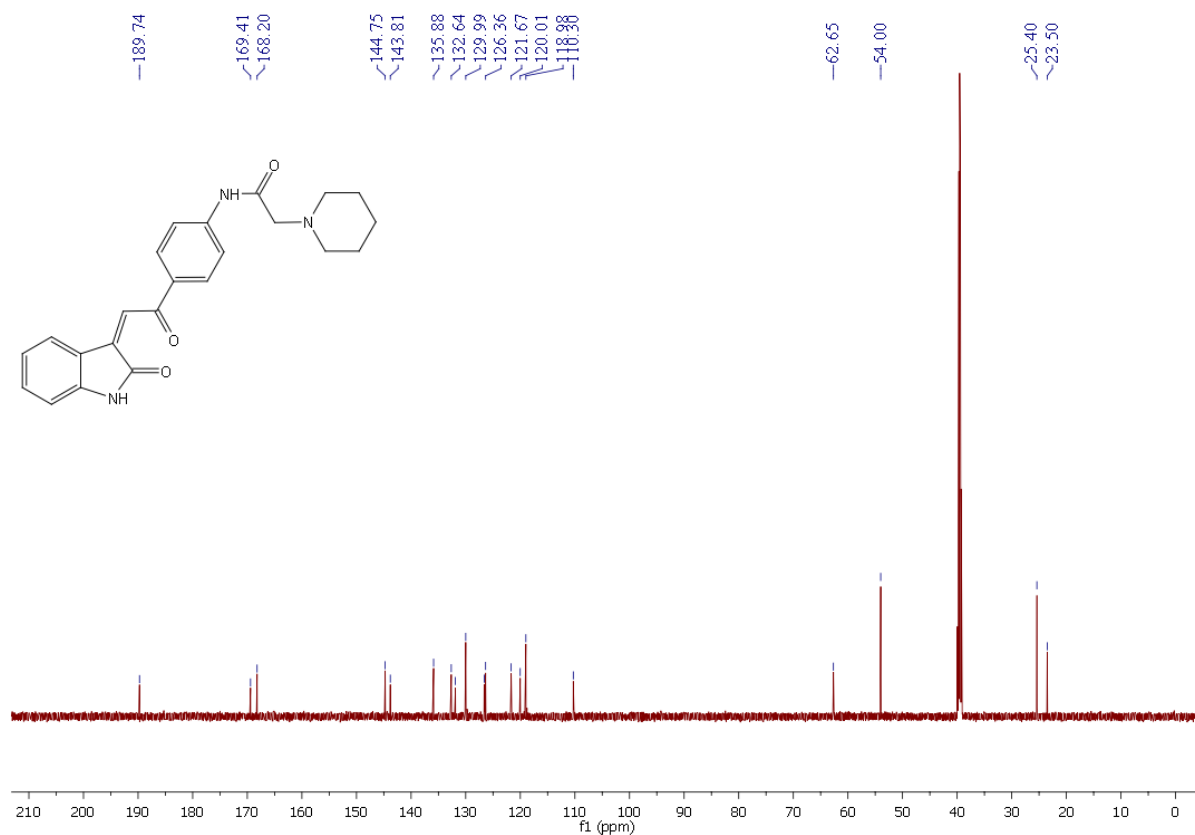

Figure S10: <sup>13</sup>C-NMR spectrum of compound 5c (150 MHz, DMSO/*d*<sub>6</sub>)

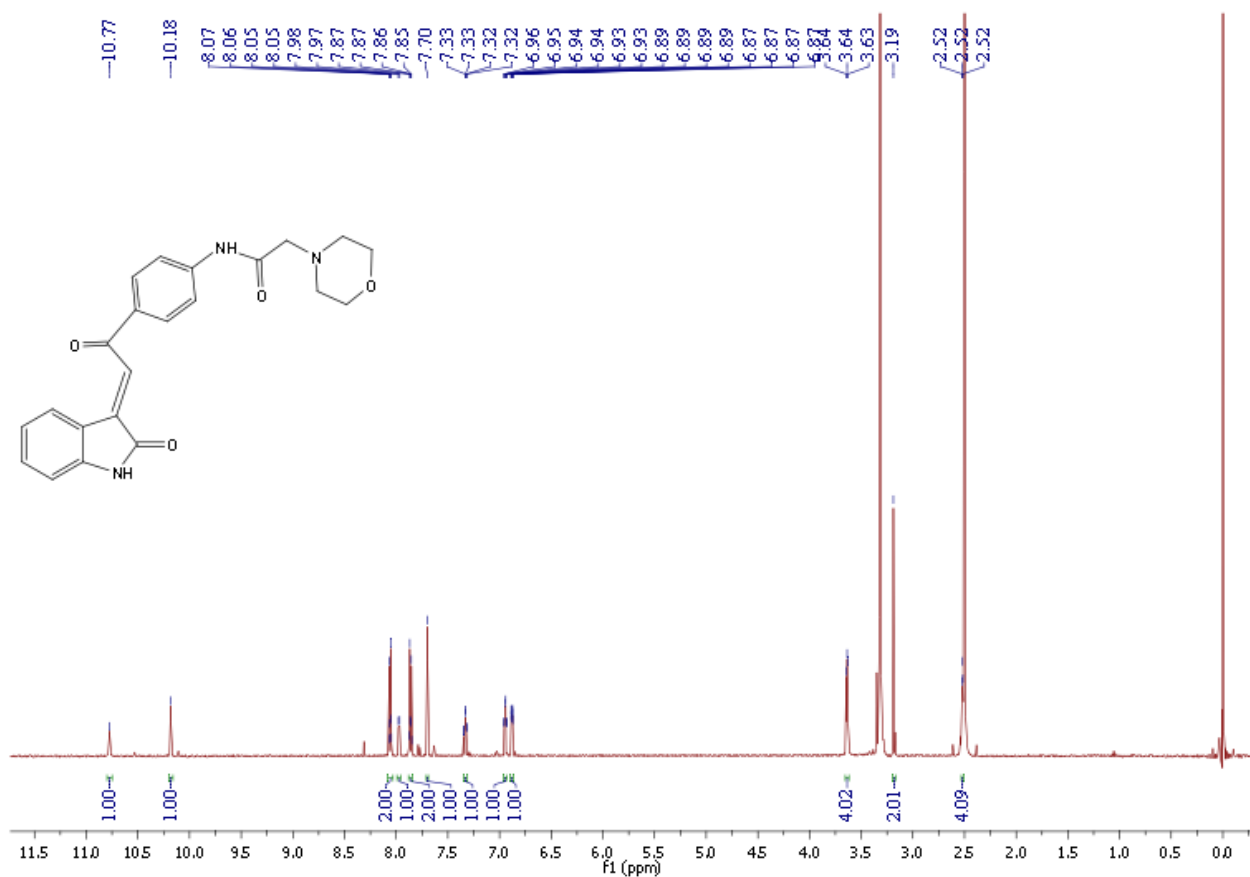

Figure S11: <sup>1</sup>H-NMR spectrum of compound **5d** (600 MHz, DMSO/*d*<sub>6</sub>)

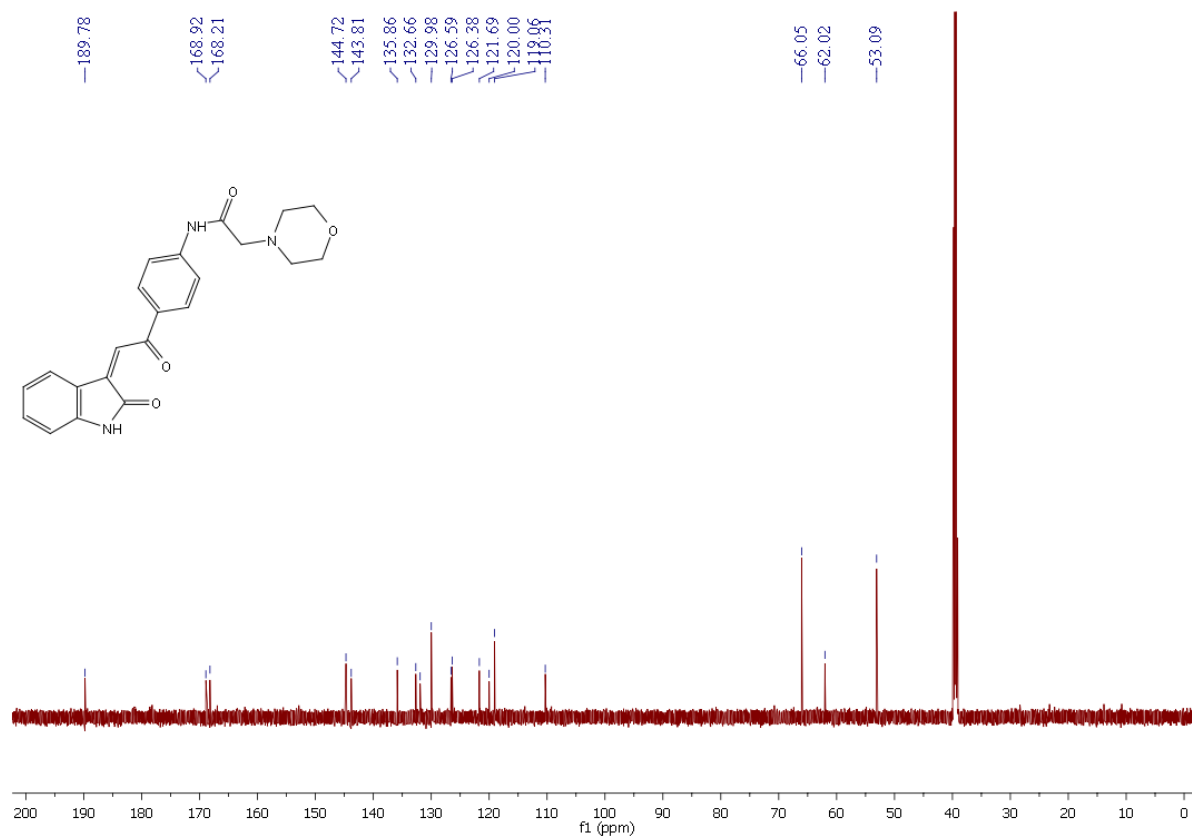

Figure S12: <sup>13</sup>C-NMR spectrum of compound **5d** (150 MHz, DMSO/*d*<sub>6</sub>)

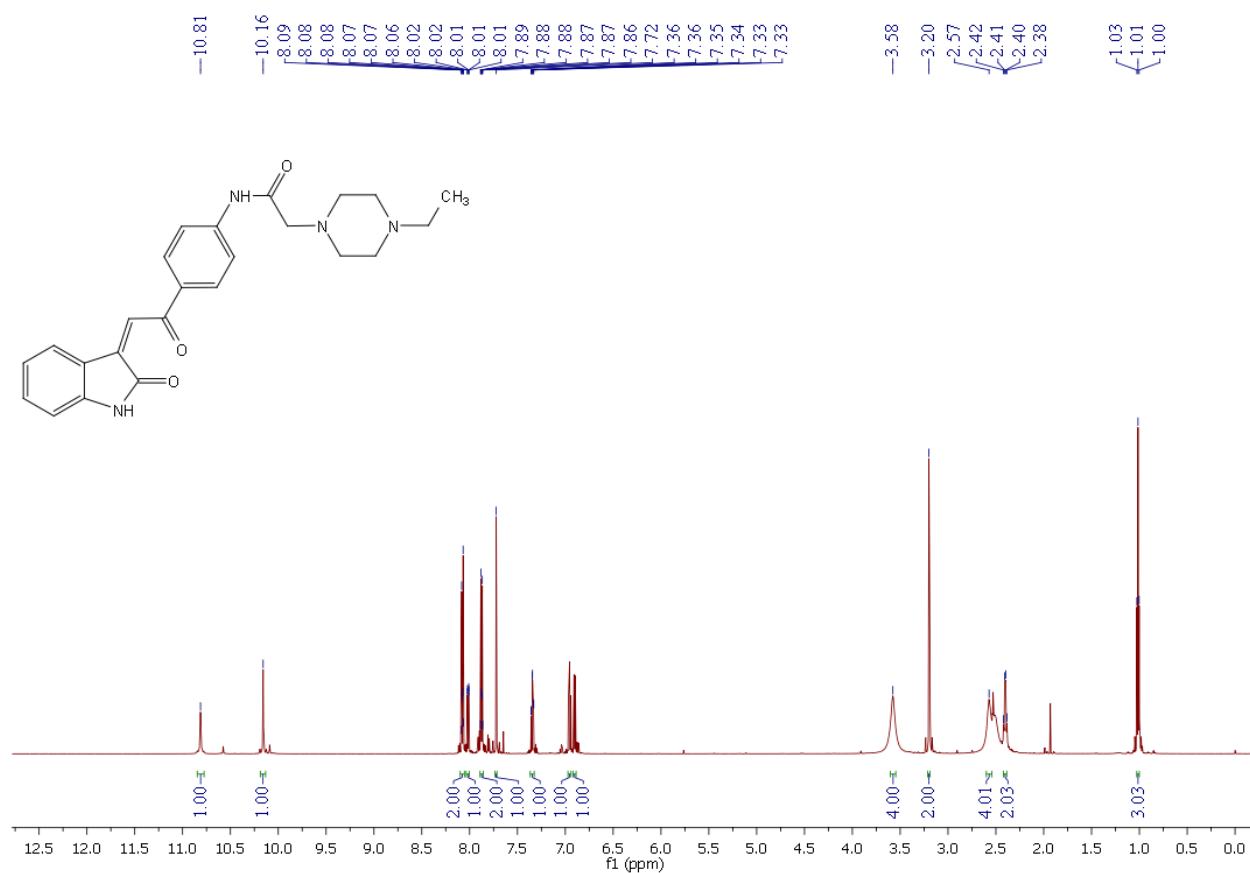

Figure S13: <sup>1</sup>H-NMR spectrum of compound 5e (600 MHz, DMSO/*d*<sub>6</sub>)

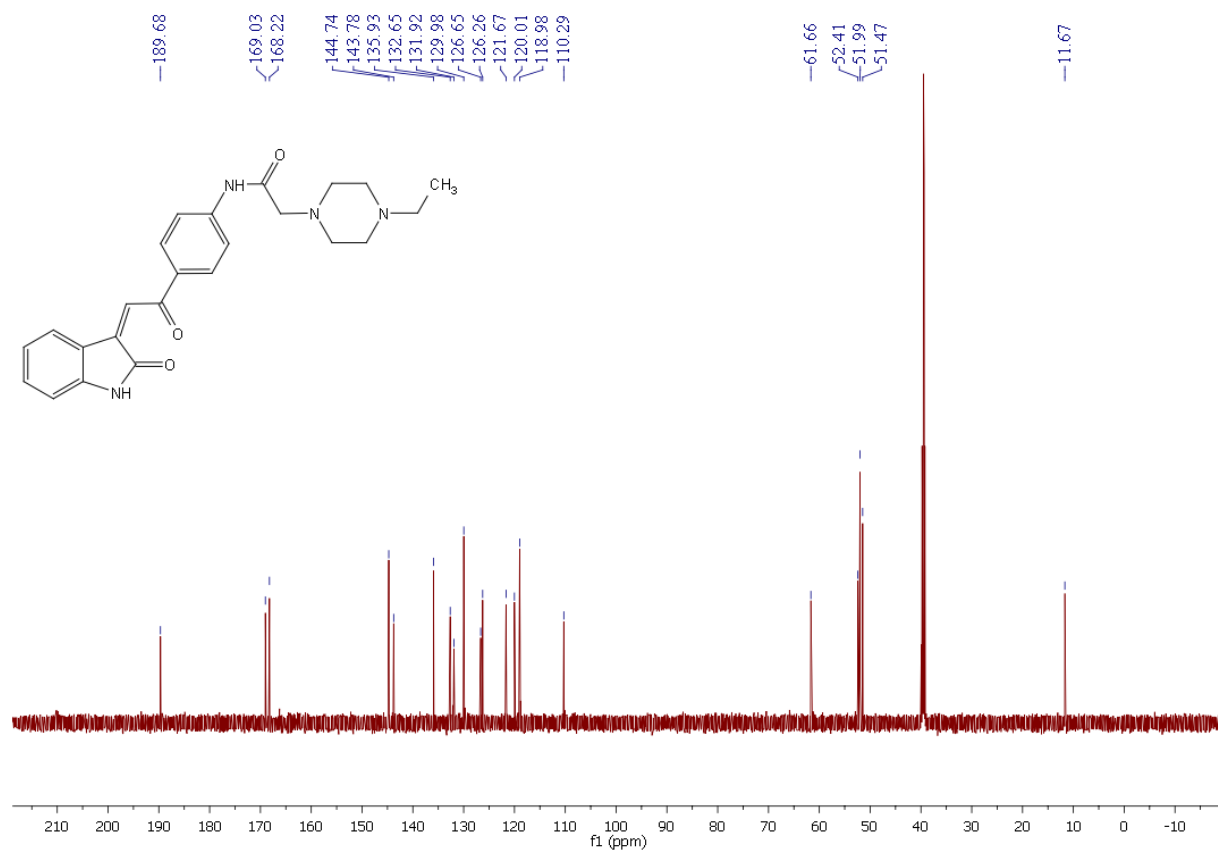

Figure S14: <sup>13</sup>C-NMR spectrum of compound 5d (150 MHz, DMSO/*d*<sub>6</sub>)

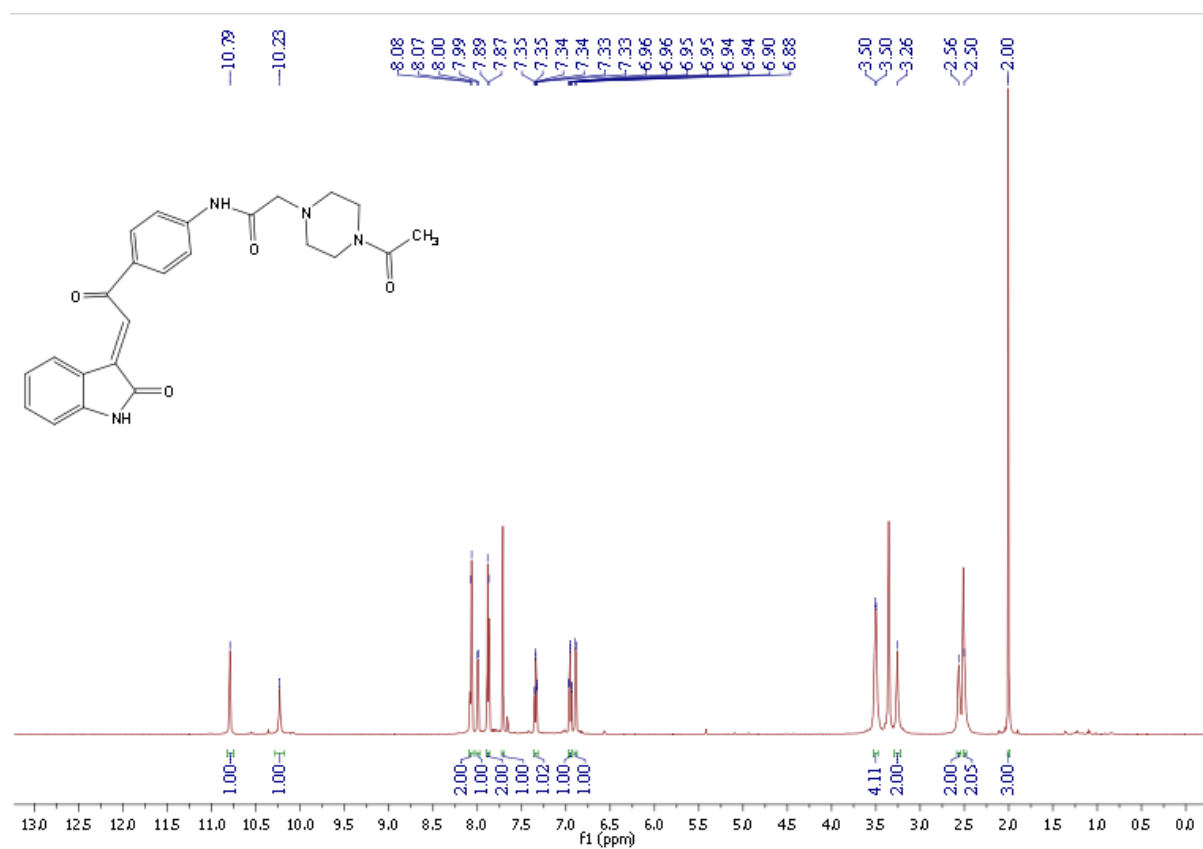

Figure S15: <sup>1</sup>H-NMR spectrum of compound 5f (600 MHz, DMSO/*d*<sub>6</sub>)

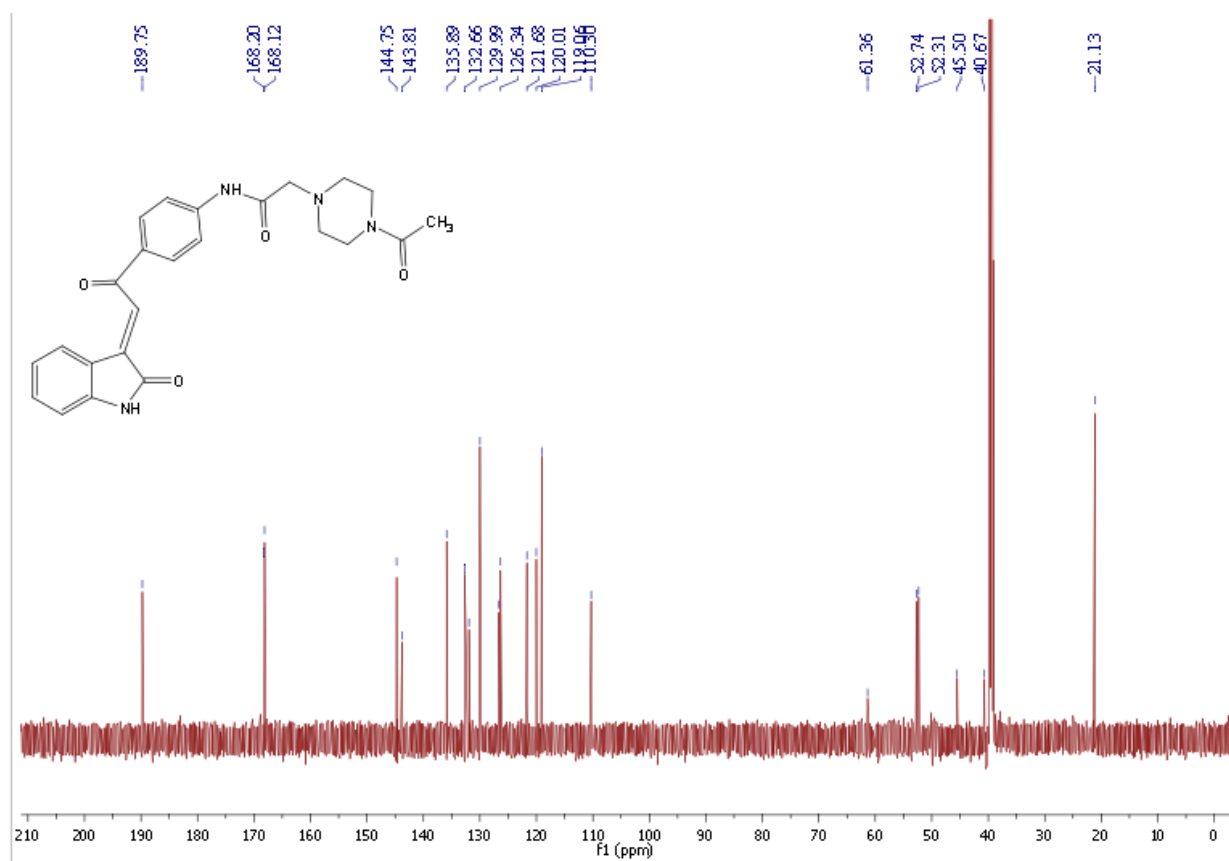

Figure S16: <sup>13</sup>C-NMR spectrum of compound 5f (150 MHz, DMSO/*d*<sub>6</sub>)

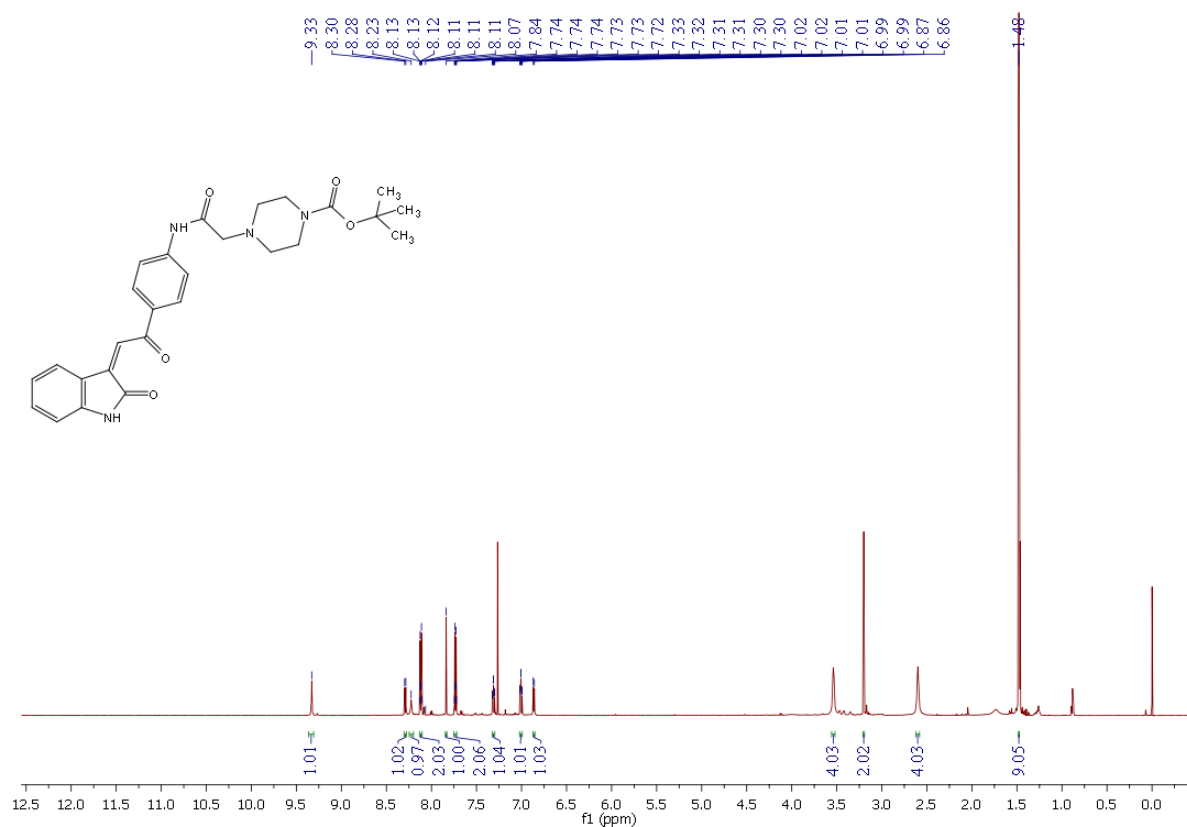

Figure S17: <sup>1</sup>H-NMR spectrum of compound **5g** (600 MHz, CDCl<sub>3</sub>)

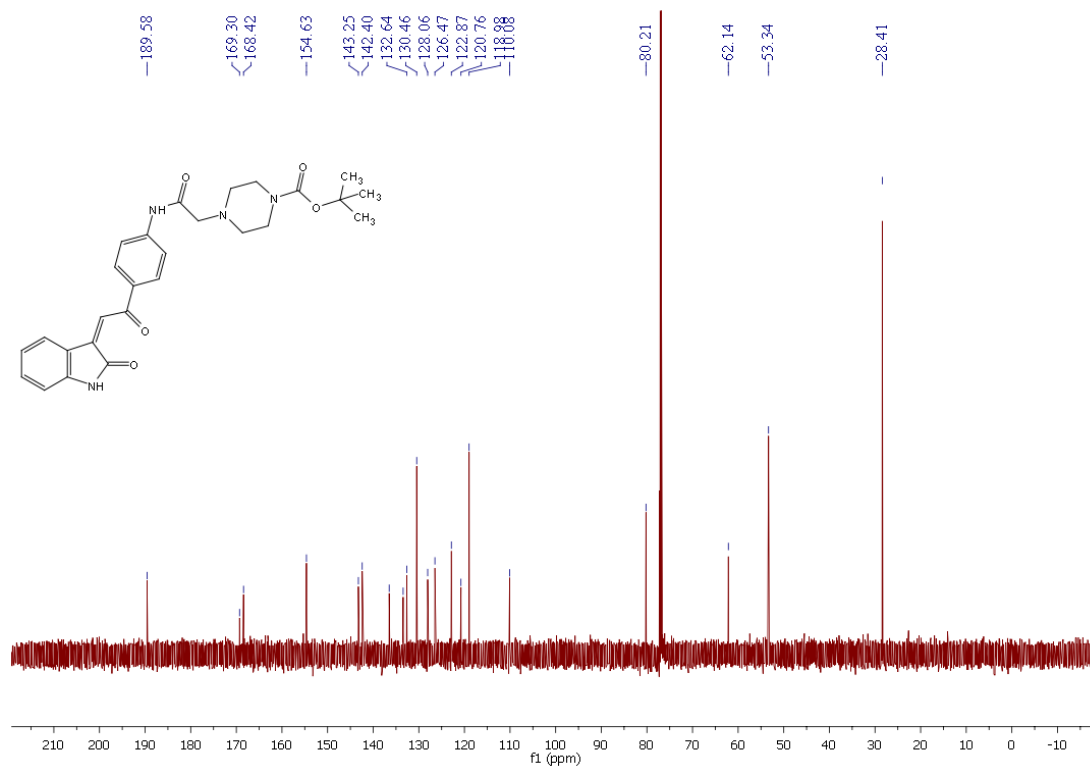

Figure S18: <sup>13</sup>C-NMR spectrum of compound **5g** (150 MHz, CDCl<sub>3</sub>)

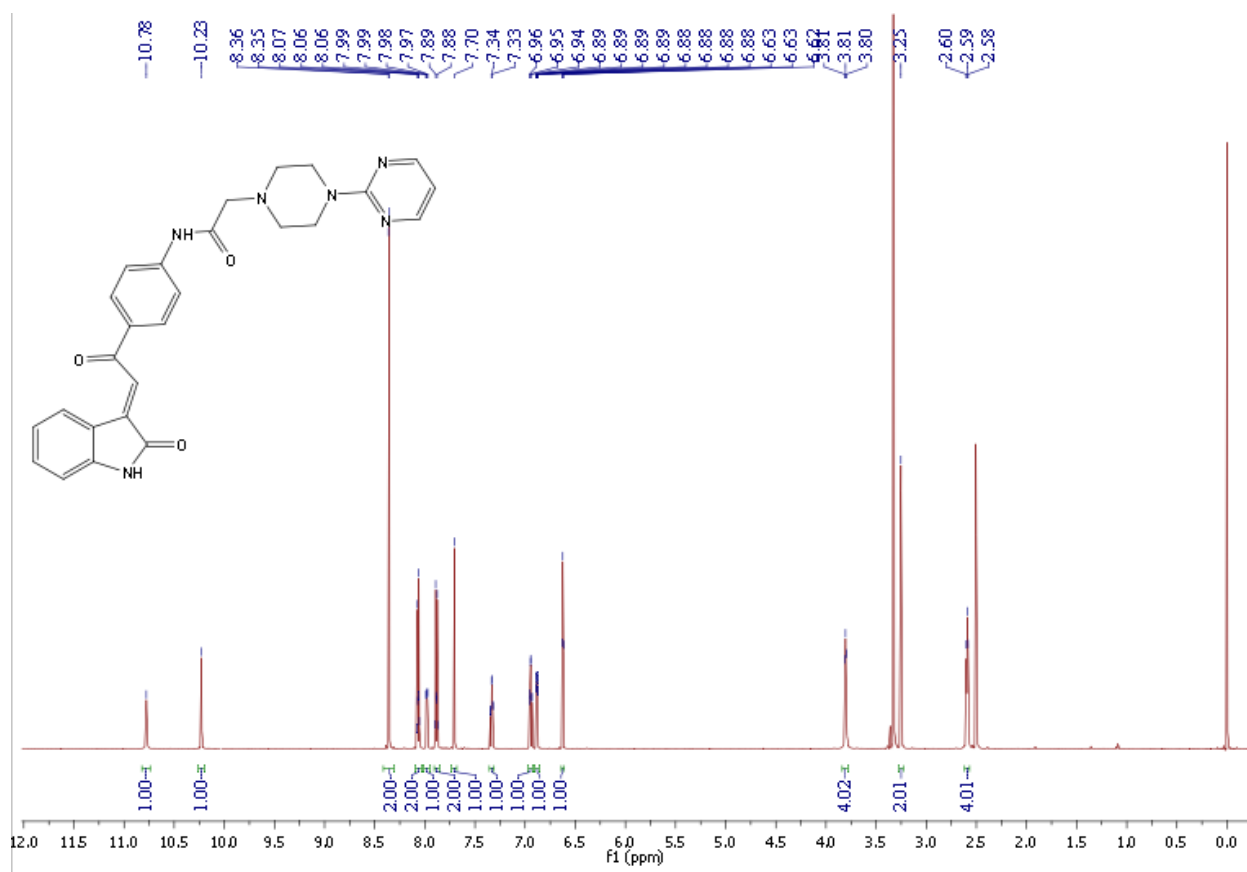

Figure S19: <sup>1</sup>H-NMR spectrum of compound **5h** (600 MHz, DMSO/*d*<sub>6</sub>)

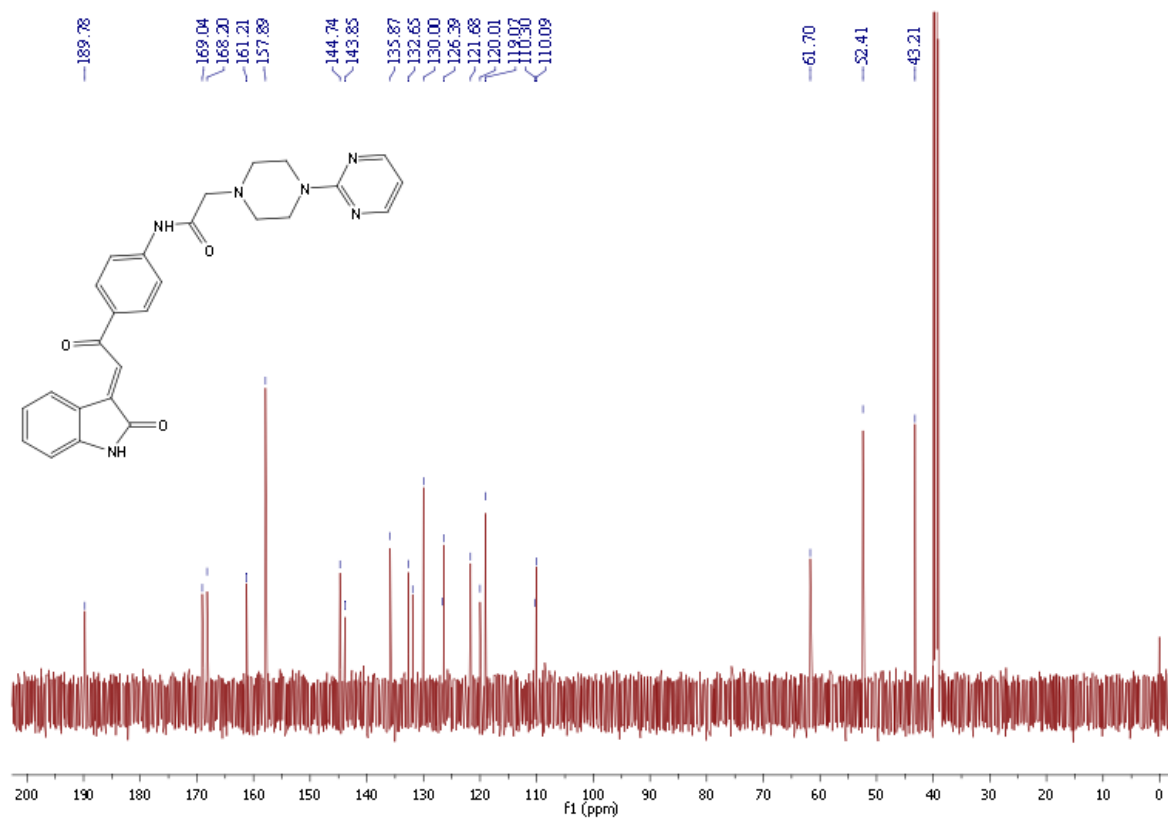

Figure S20: <sup>13</sup>C-NMR spectrum of compound **5h** (150 MHz, DMSO/*d*<sub>6</sub>)

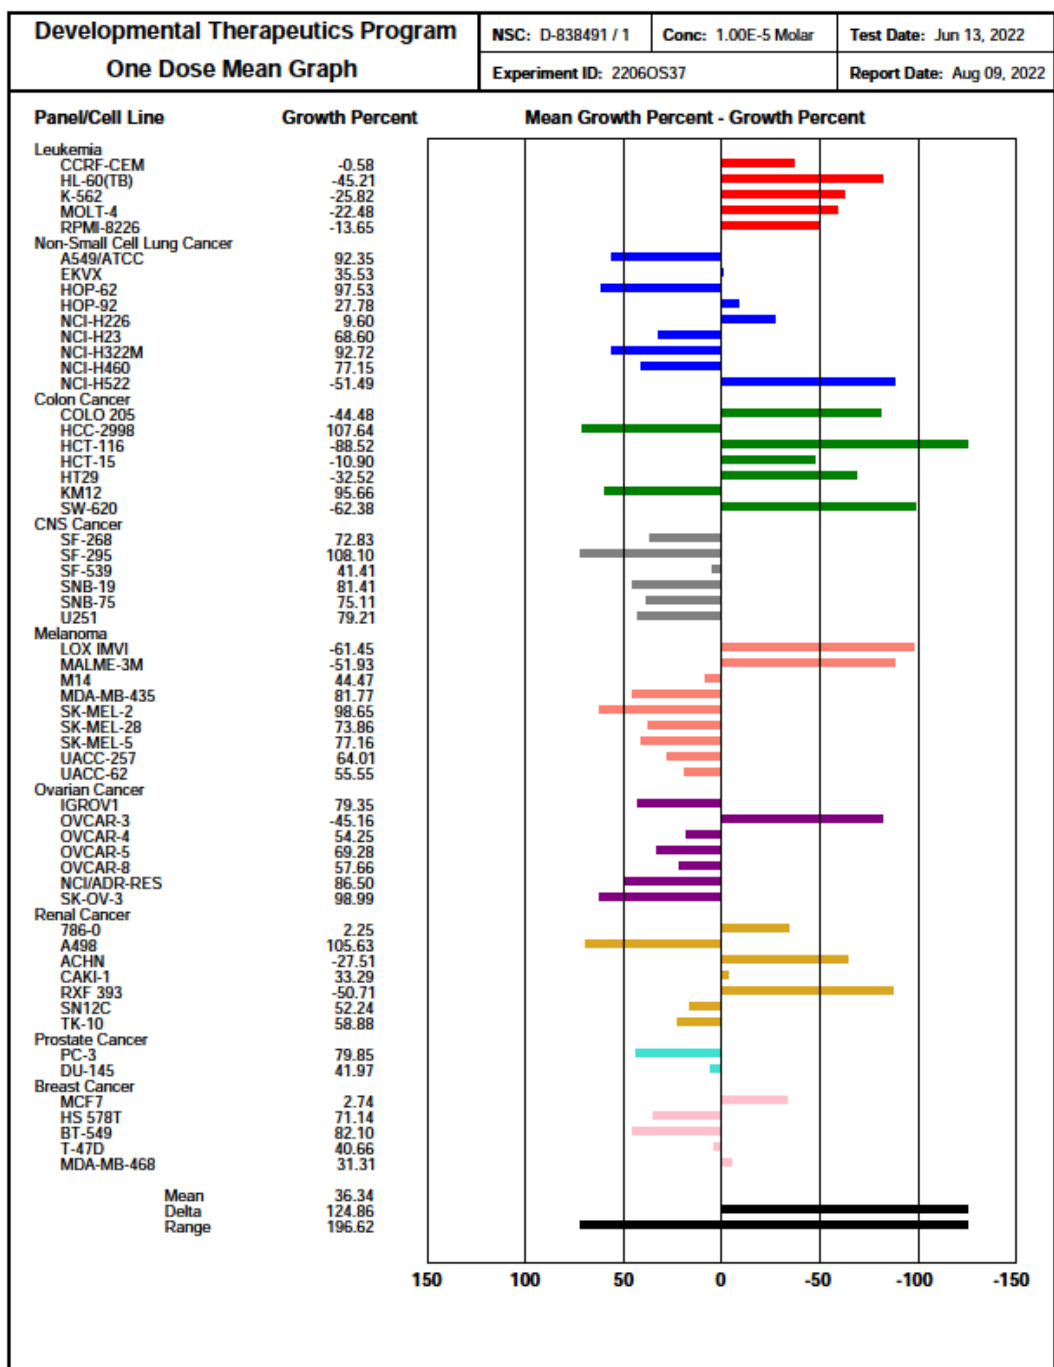

Figure S21. NCI SRB assay mean graph of compound **5a** at 10  $\mu$ M concentration.

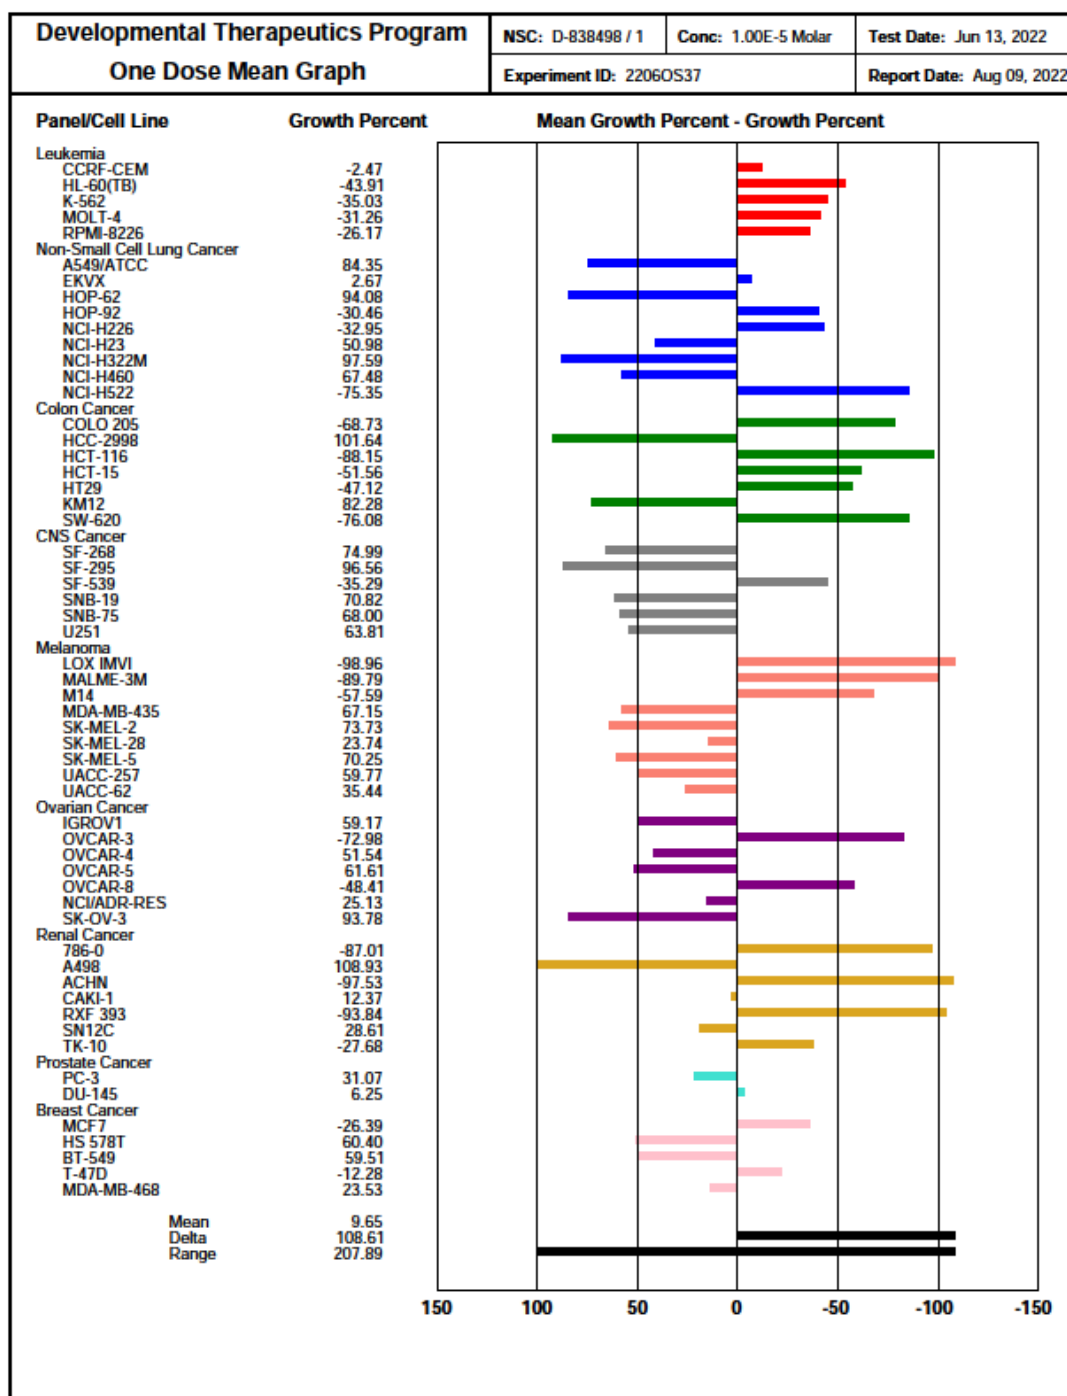

Figure S22. NCI SRB assay mean graph of compound **5b** at 10  $\mu$ M concentration.

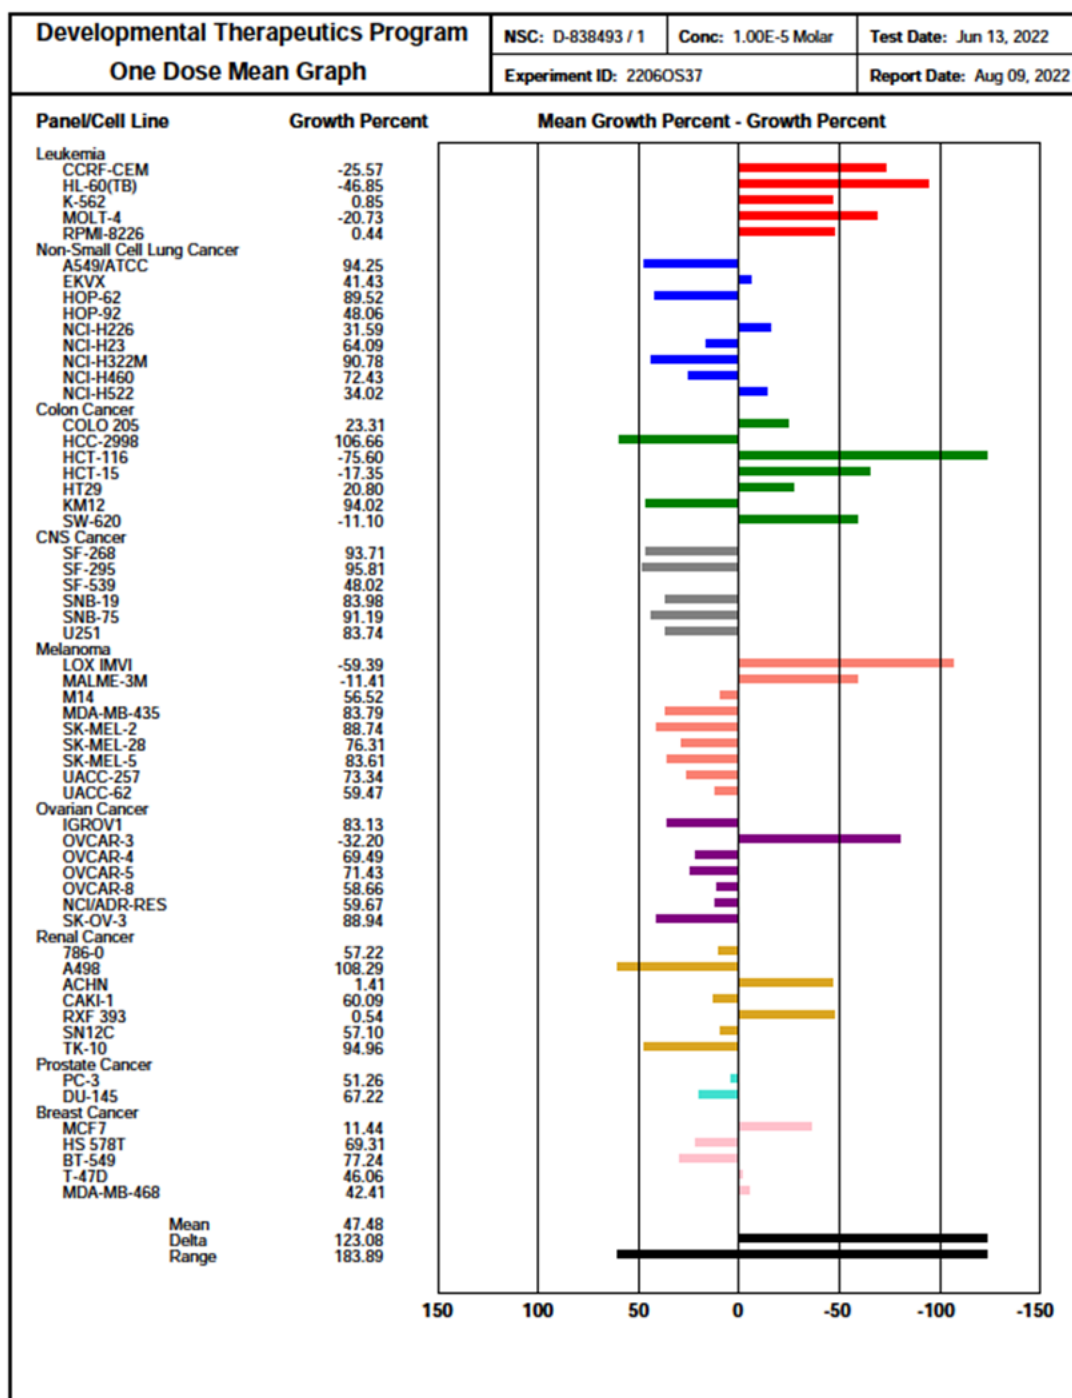

Figure S23. NCI SRB assay mean graph of compound 5c at 10  $\mu$ M concentration.

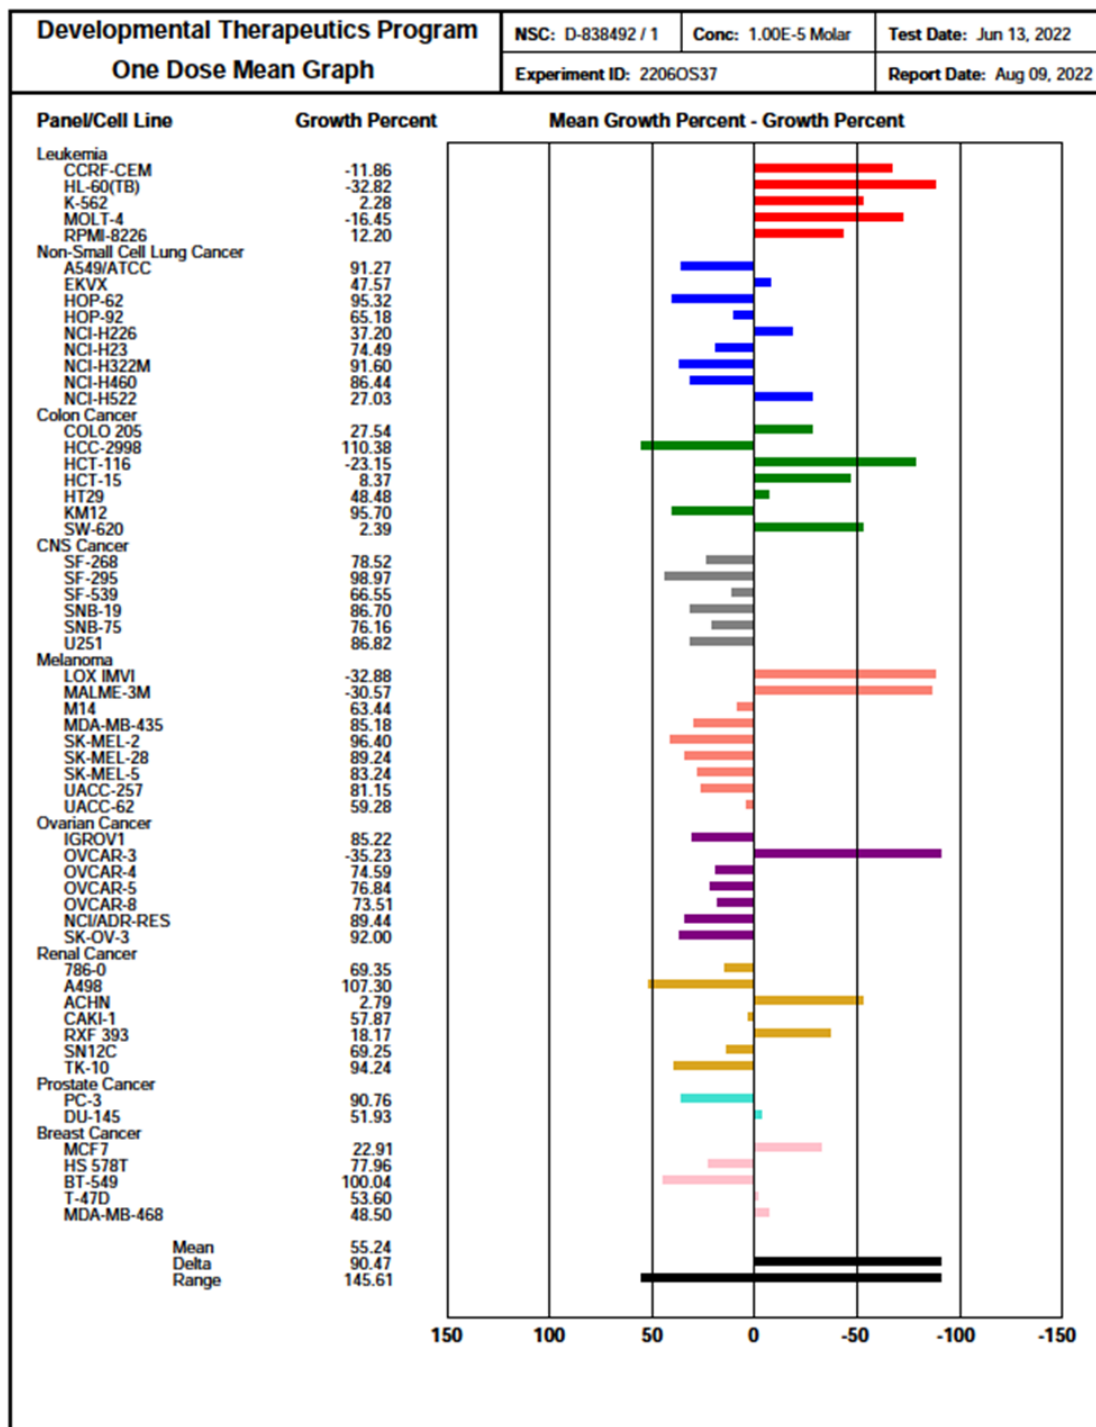

Figure S24. NCI SRB assay mean graph of compound **5d** at 10  $\mu$ M concentration.

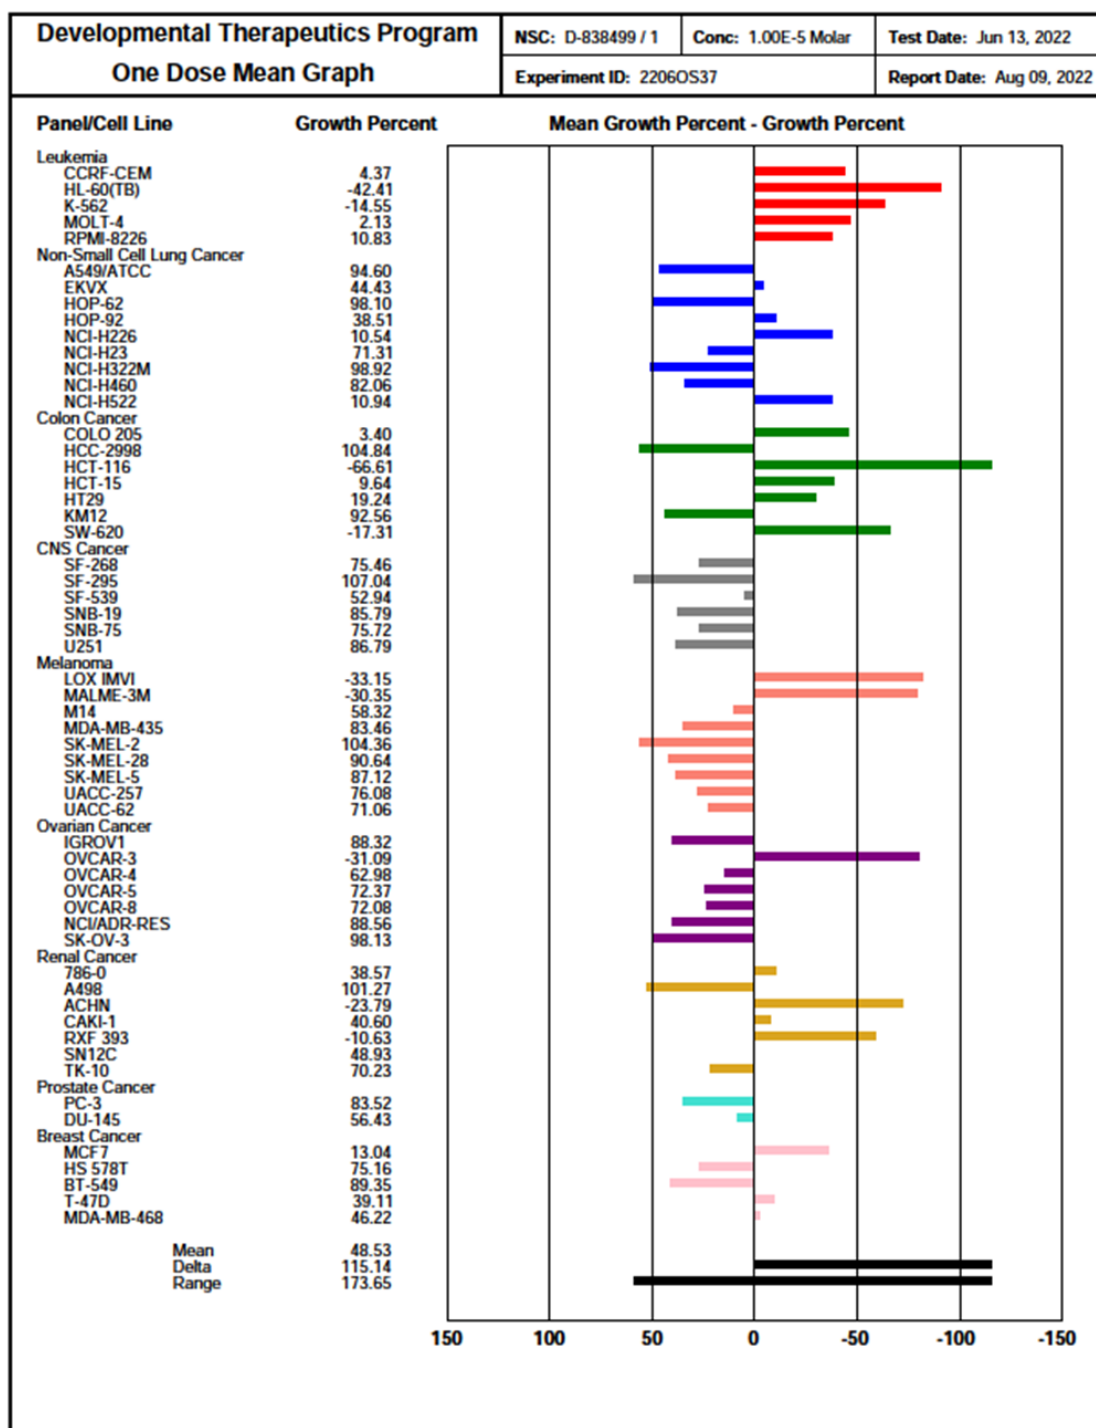

Figure S25. NCI SRB assay mean graph of compound **5e** at 10  $\mu$ M concentration.

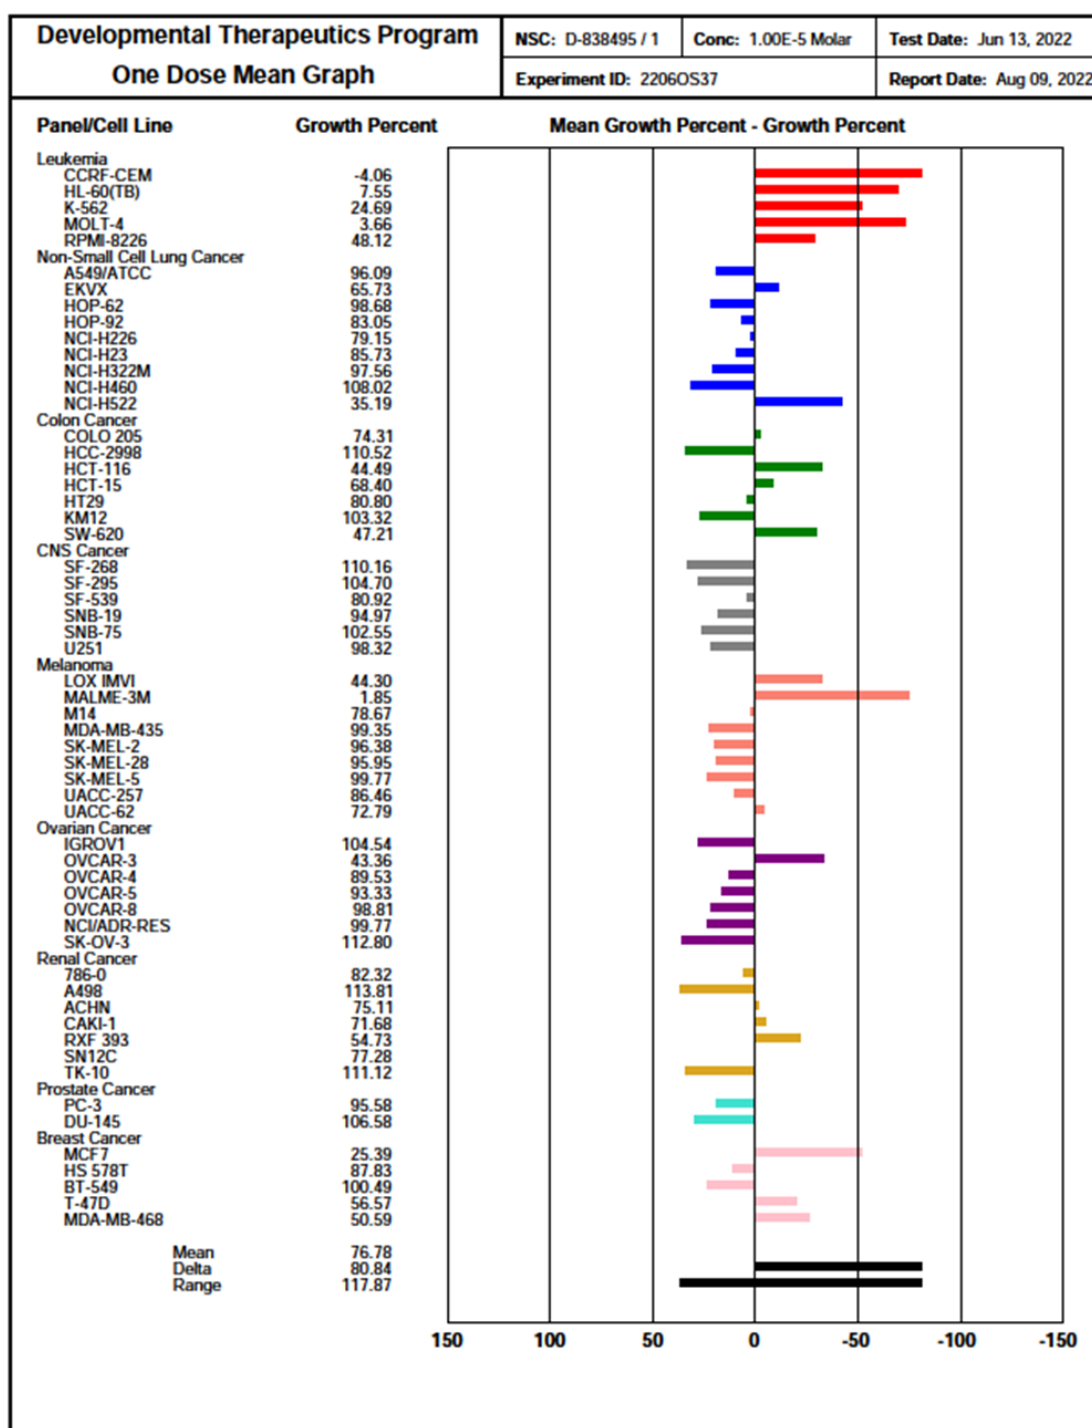

Figure S26. NCI SRB assay mean graph of compound 5f at 10  $\mu$ M concentration.

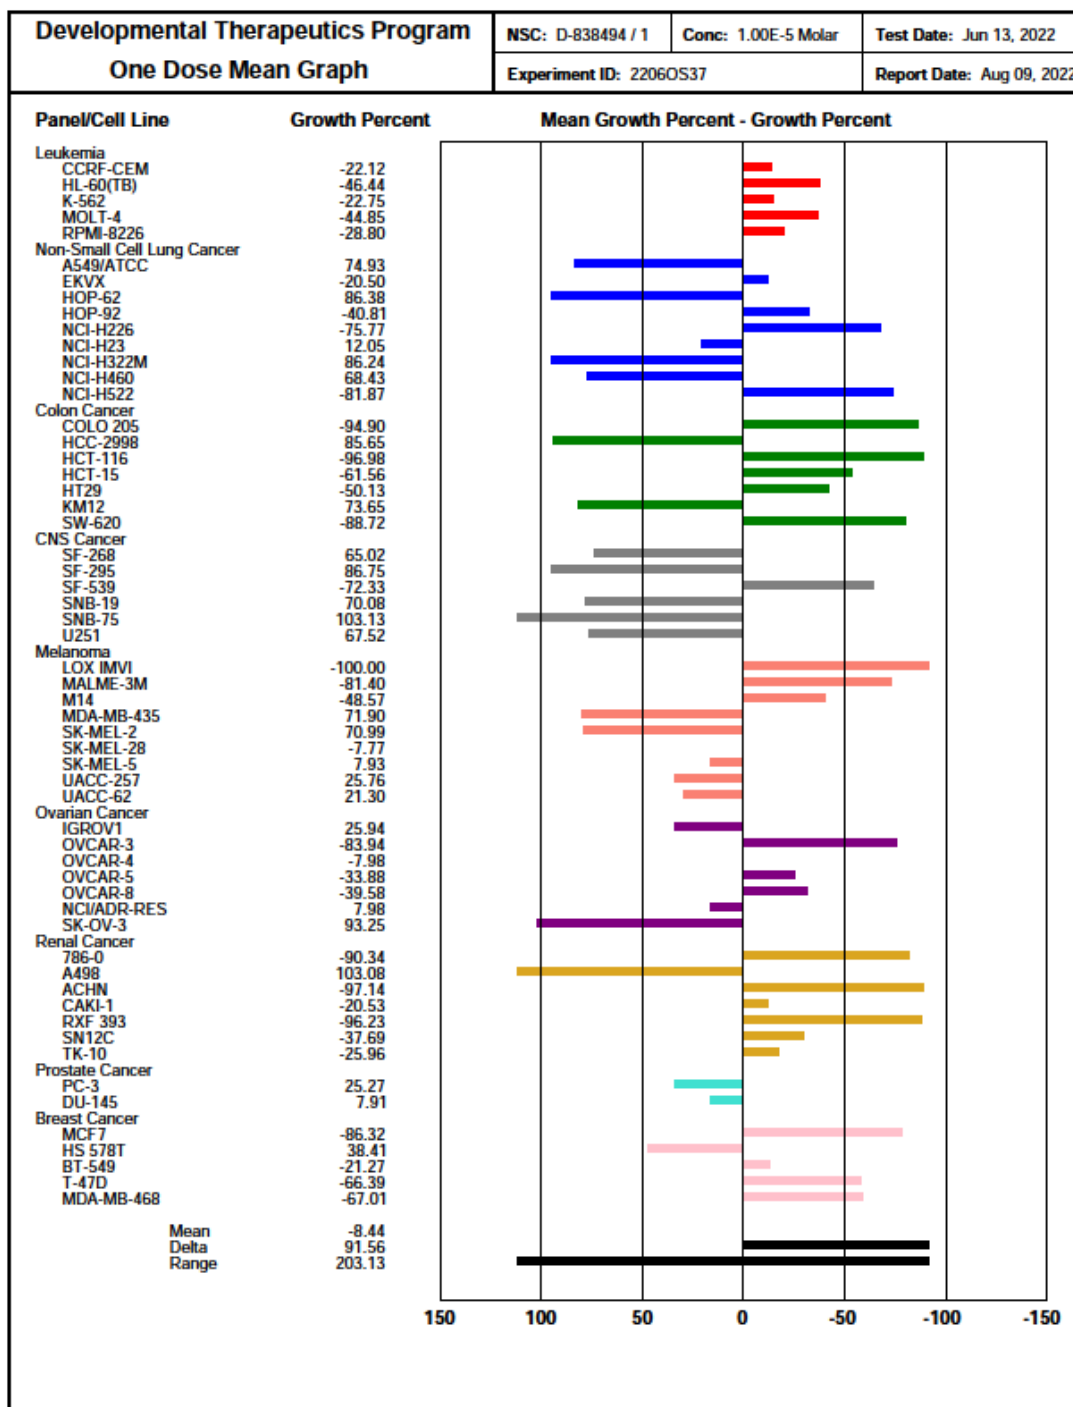

Figure S27. NCI SRB assay mean graph of compound **5g** at 10  $\mu$ M concentration.

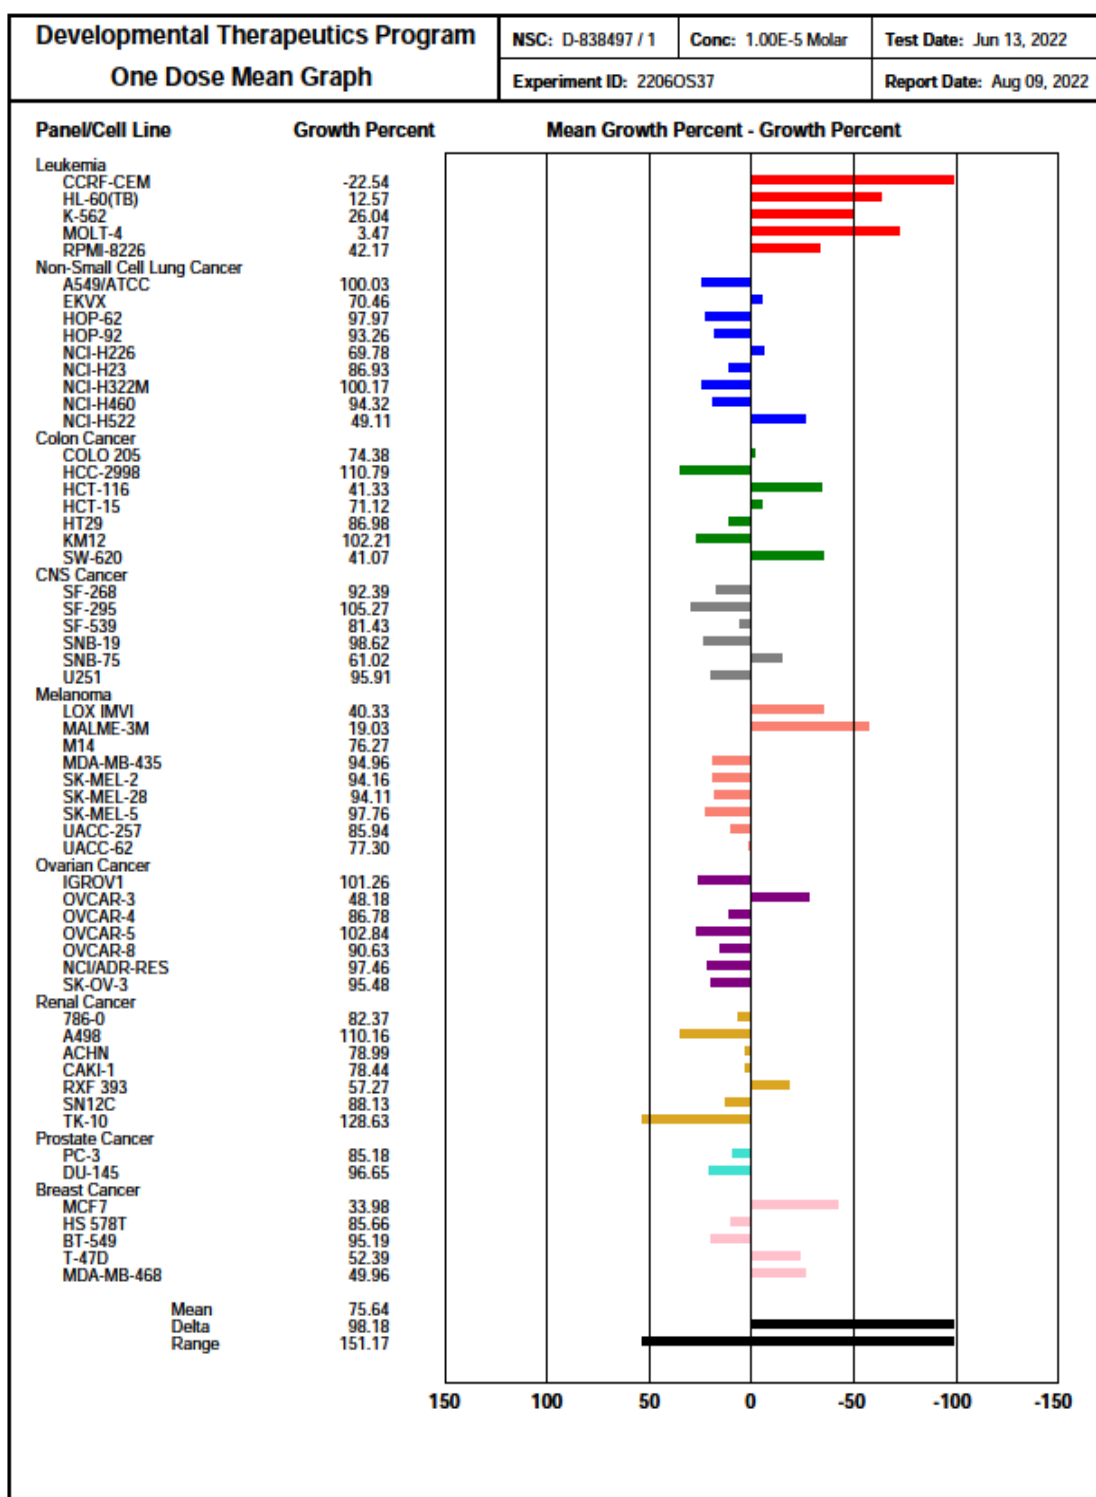

Figure S28. NCI SRB assay mean graph of compound **5h** at 10  $\mu$ M concentration.
